# Supplementary material
Source: publisher figshare collection journal article supplement (https://acs.figshare.com/ndownloader/files/3771811)
Supplement: Supplementary file 1 [file 3771811]

## Supporting Information

### **Directed Assembly of Ultrathin Gold Nanowires over Large Area by Dielectrophoresis**

R. Venkatesh, Subhajit Kundu, Avradip Pradhan, T. Phanindra Sai, Arindam Ghosh and N. Ravishankar

#### **I. TEM imaging of Au nanowires**

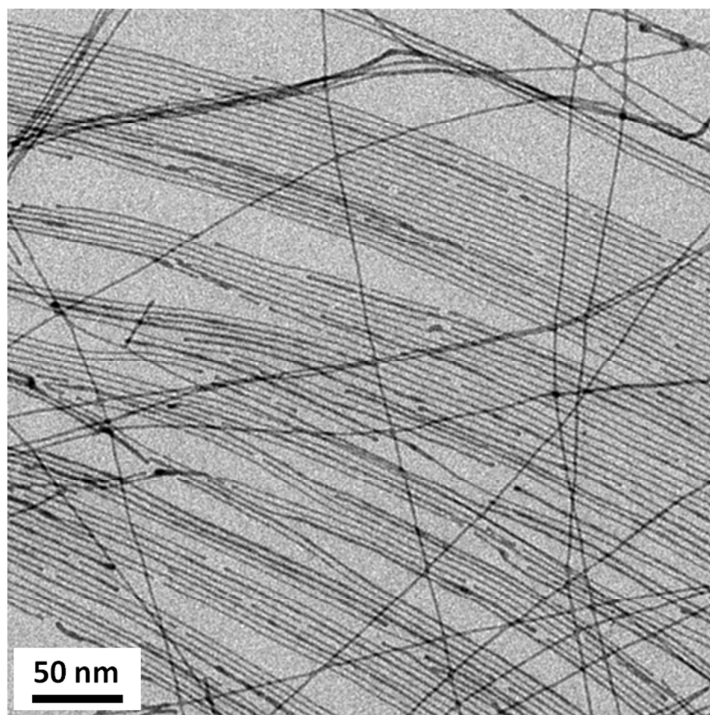

**Figure S1:** TEM image of Au nanowires deposited onto the TEM support membrane during growth.

## II. SEM imaging of Au nanowires

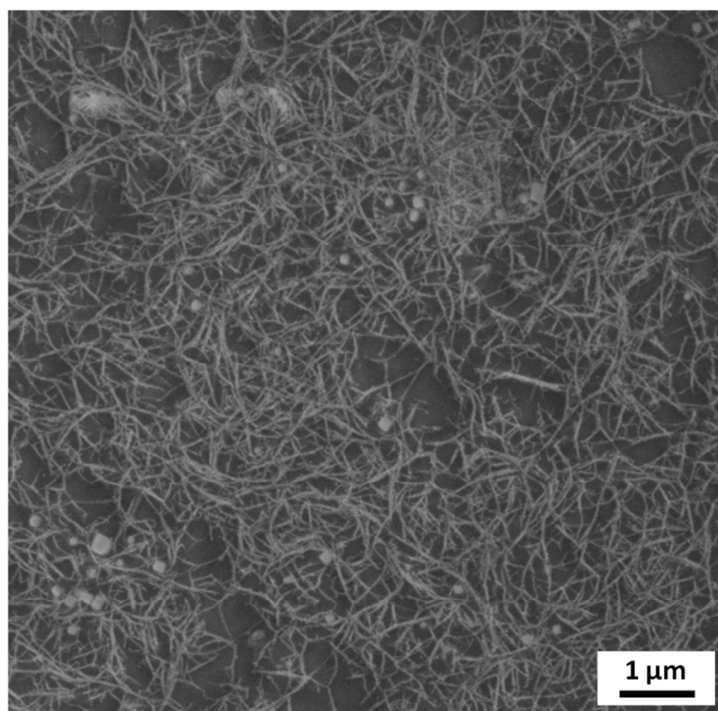

**Figure S2:** SEM image of toluene cleaned Au nanowires drocasted onto Si wafer.

### III.SEM imaging of Au nanowire in different $V_{pp}$ and Frequency

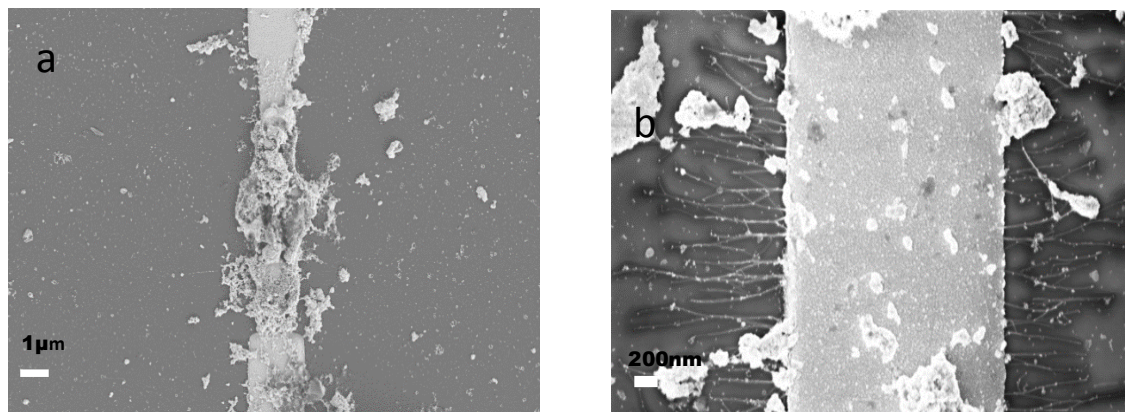

**Figure S3a**,Between the contact pads; **FigureS3b** along the sides of the contact pads in 5MHz; 10V<sub>pp</sub> range

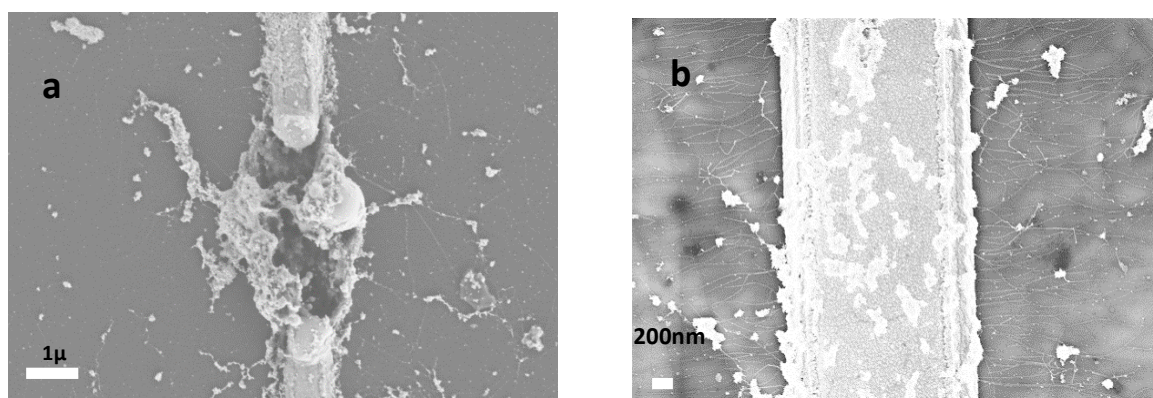

**Figure S4a** Between the contact pads; **Figure S4b** along the sides of the contact pads in 7MHz; 10V<sub>pp</sub> range

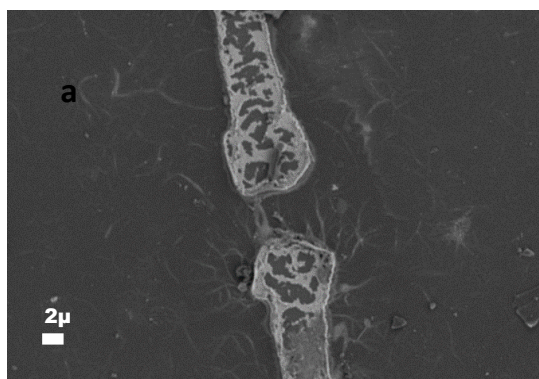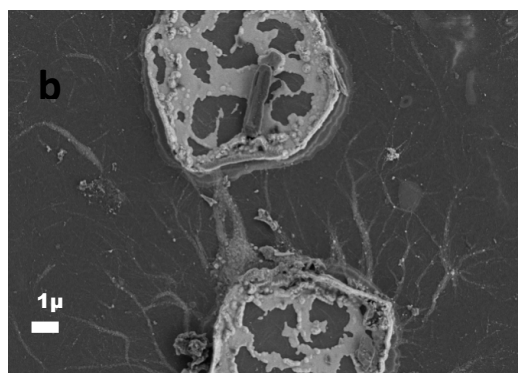

**Figure S5a** 15MHz; 10V<sub>pp</sub> ; **Figure S5b** higher magnification of the same image
